# Supplementary material for: Uptake of Skilled Maternal Healthcare in Ethiopia: A Positive Deviance Approach
Source: MDPI journal article supplement (doi:10.3390/ijerph17051712), 2020-03-05
Supplement: s1 [file s1]

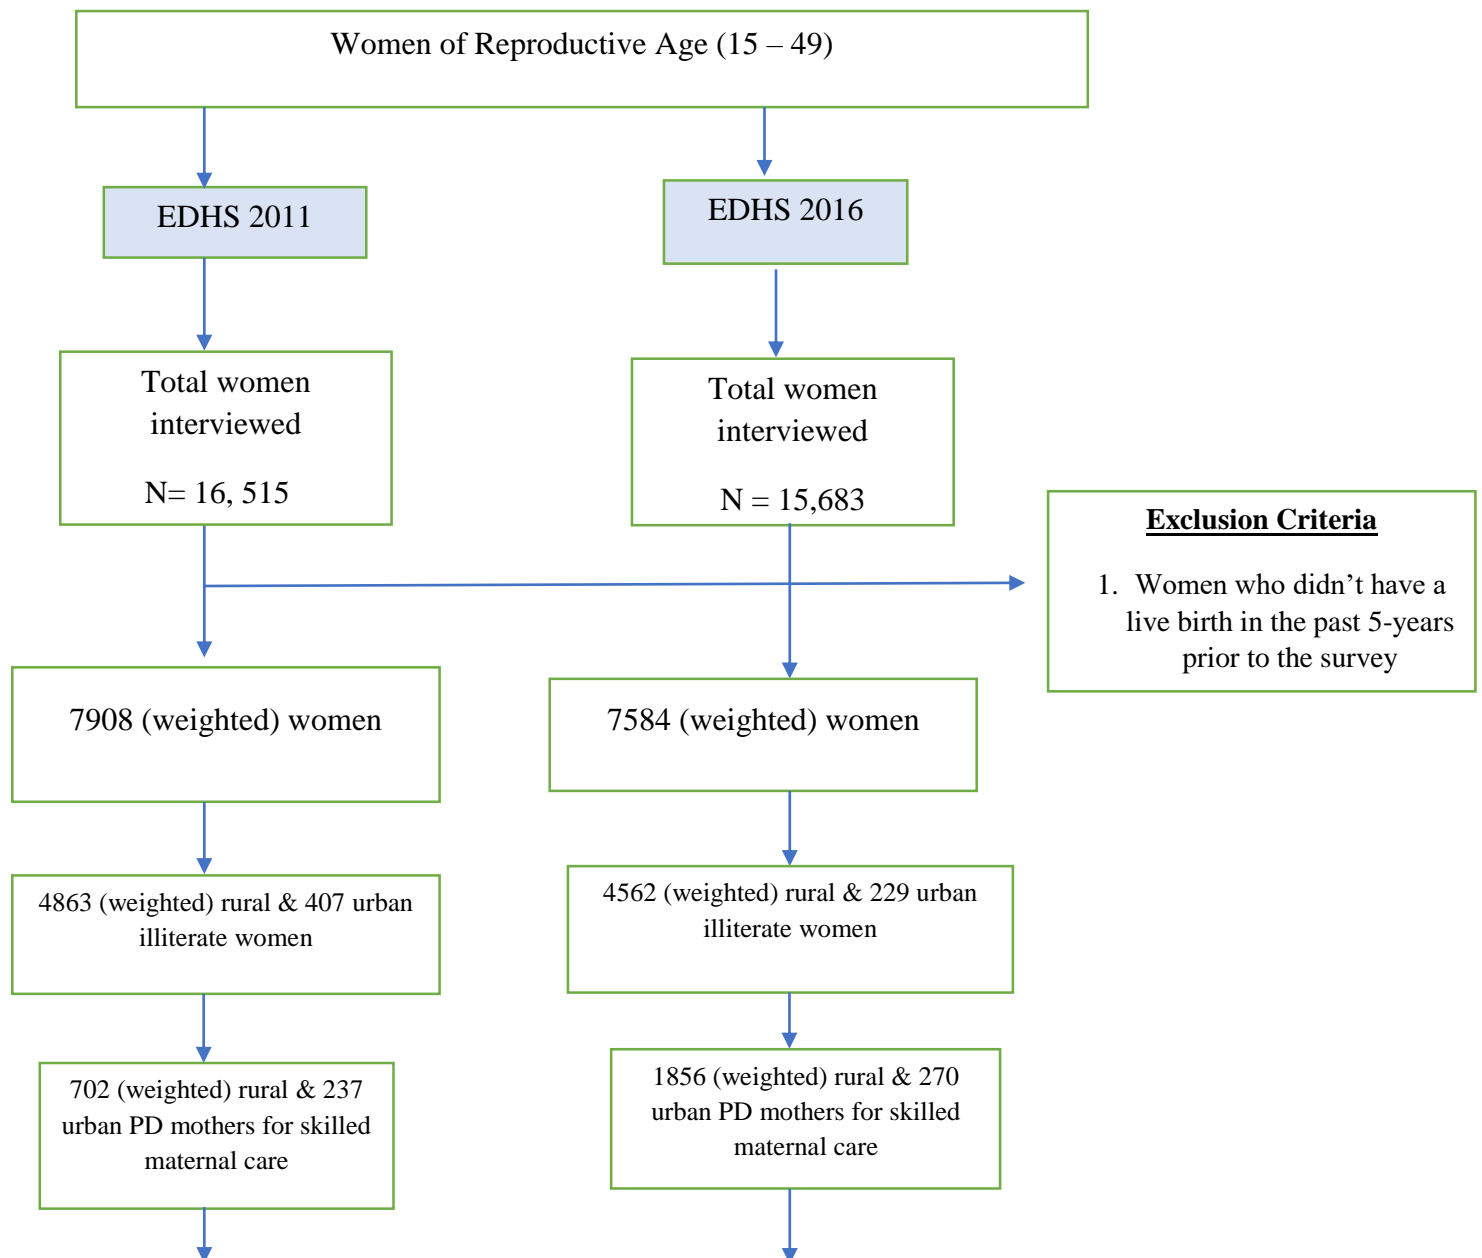

Fig S1. Schematic presentation showing sampling in the 2011 and 2016 Ethiopian Demographic Health Surveys for identification of Positive Deviants on skilled maternal healthcare use
